# Supplementary material for: Thyroid Hormone Transporters MCT8 and OATP1C1 Are Expressed in Projection Neurons and Interneurons of Basal Ganglia and Motor Thalamus in the Adult Human and Macaque Brains
Source: MDPI journal article supplement (doi:10.3390/ijms24119643), 2023-06-01
Supplement: s1 [file s1]

*Type of the Paper (Article)*

# **Thyroid Hormone Transporters MCT8 and OATP1C1 Are Expressed in Projection Neurons and Interneurons of Basal Ganglia and Motor Thalamus in the Adult Human and Macaque Brain**

**Ting Wang <sup>1,3, †</sup>, Yu Wang <sup>1,3, †</sup>, Ana Montero-Pedrazuela <sup>2</sup>, Lucía Prensa <sup>1</sup>, Ana Guadaño-Ferraz <sup>2,\*</sup>, Estrella Rausell <sup>1,\*</sup>**

<sup>1</sup> School of Medicine, Dept Anatomy Histology & Neuroscience, Autónoma de Madrid University (UAM), 28029 Madrid, Spain.

<sup>2</sup> Instituto de Investigaciones Biomédicas Alberto Sols, Consejo Superior de Investigaciones Científicas (CSIC)-Autónoma de Madrid University (UAM), 28029 Madrid, Spain.

<sup>3</sup> PhD Program in Neuroscience, Autónoma de Madrid University (UAM)-Cajal Institute, 28029 Madrid, Spain.

† These authors contributed equally to this work.

\* Correspondence: ER: [estrella.rausell@uam.es](mailto:estrella.rausell@uam.es); AG-F: [ana.guadano.ferraz@csic.es](mailto:ana.guadano.ferraz@csic.es), [aguadano@iib.uam.es](mailto:aguadano@iib.uam.es).

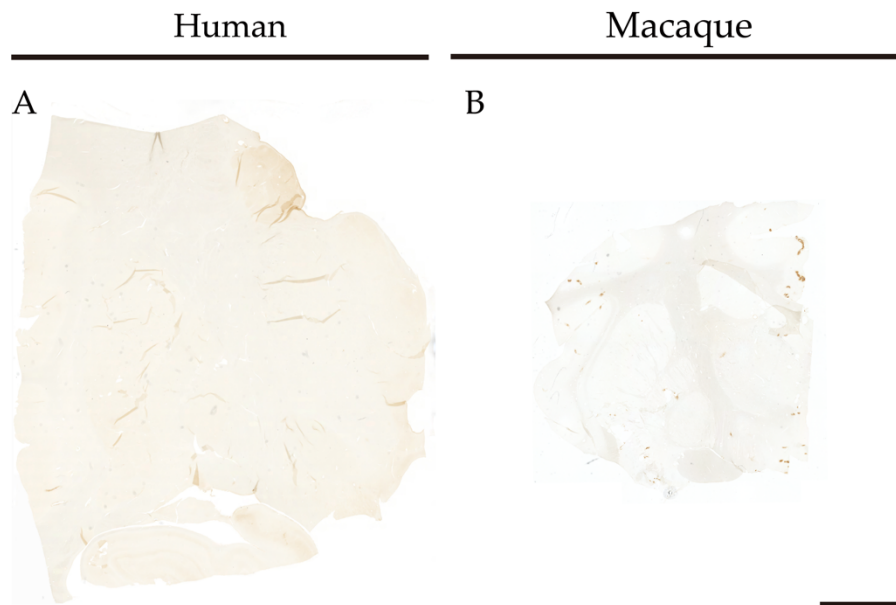

**Figure S1.** Negative control sections for the immunostaining protocol in human and macaque brain tissue. Representative brightfield photomicrographs show the results of the immunostaining procedure without the primary antibody in human and macaque brain tissue in sections that had been processed at the same time that those shown in the main text. (A) The caudate nucleus has a slightly nonspecific background, and (B) nonspecific DAB deposits can be seen at the tissue's edge or at the break caused by over-time DAB developing, however, no neural or capillary immunoreactivity is detected in human (A) or macaque (B) brain tissue sections without using primary antibodies. Scale bar = 8000  $\mu\text{m}$  (A) 6000  $\mu\text{m}$  (B).

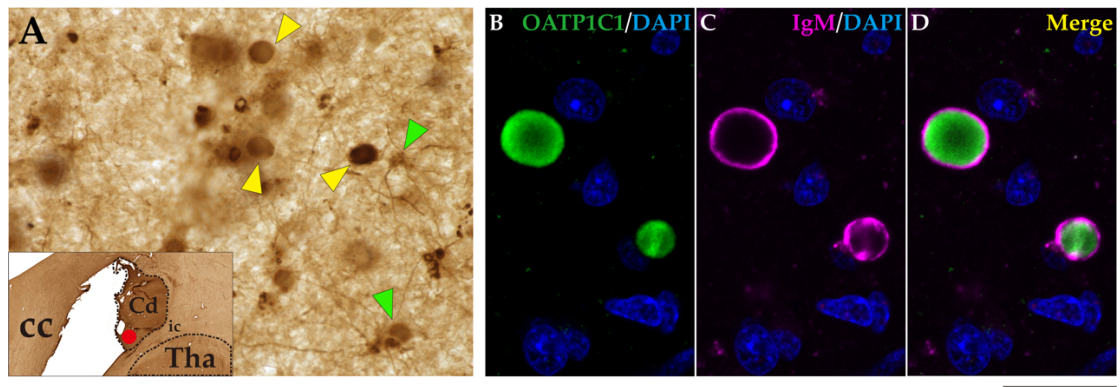

**Figure S2.** Expression of OATP1C1 in Corpora amylacea at the human neostriatum. Representative brightfield photomicrographs showing immunostaining for OATP1C1 in the human caudate nucleus. **(A)** Expression OATP1C1 in *Corpora amylacea* (yellow arrowheads) on the border of the caudate nucleus and ventricle. The high magnification image is extracted from the location at the red point in the lower magnification inset. Note some OATP1C1 immunopositive astrocyte-like cells (green arrowhead). **(B-D)** Confocal microscope images of double labeling for OATP1C1 (green, **B**), and the *Corpora amylacea* marker IgM (purple, **C**). The merged image (**D**) shows the colocalization of the OATP1C1 and IgM. Counterstaining with DAPI (blue) shows nuclei of all cells. cc: corpus callosum, Cd: caudate nucleus, ic: internal capsule, Tha: thalamus. Scale bar = 50  $\mu\text{m}$  (A) and 20  $\mu\text{m}$  (B-D).

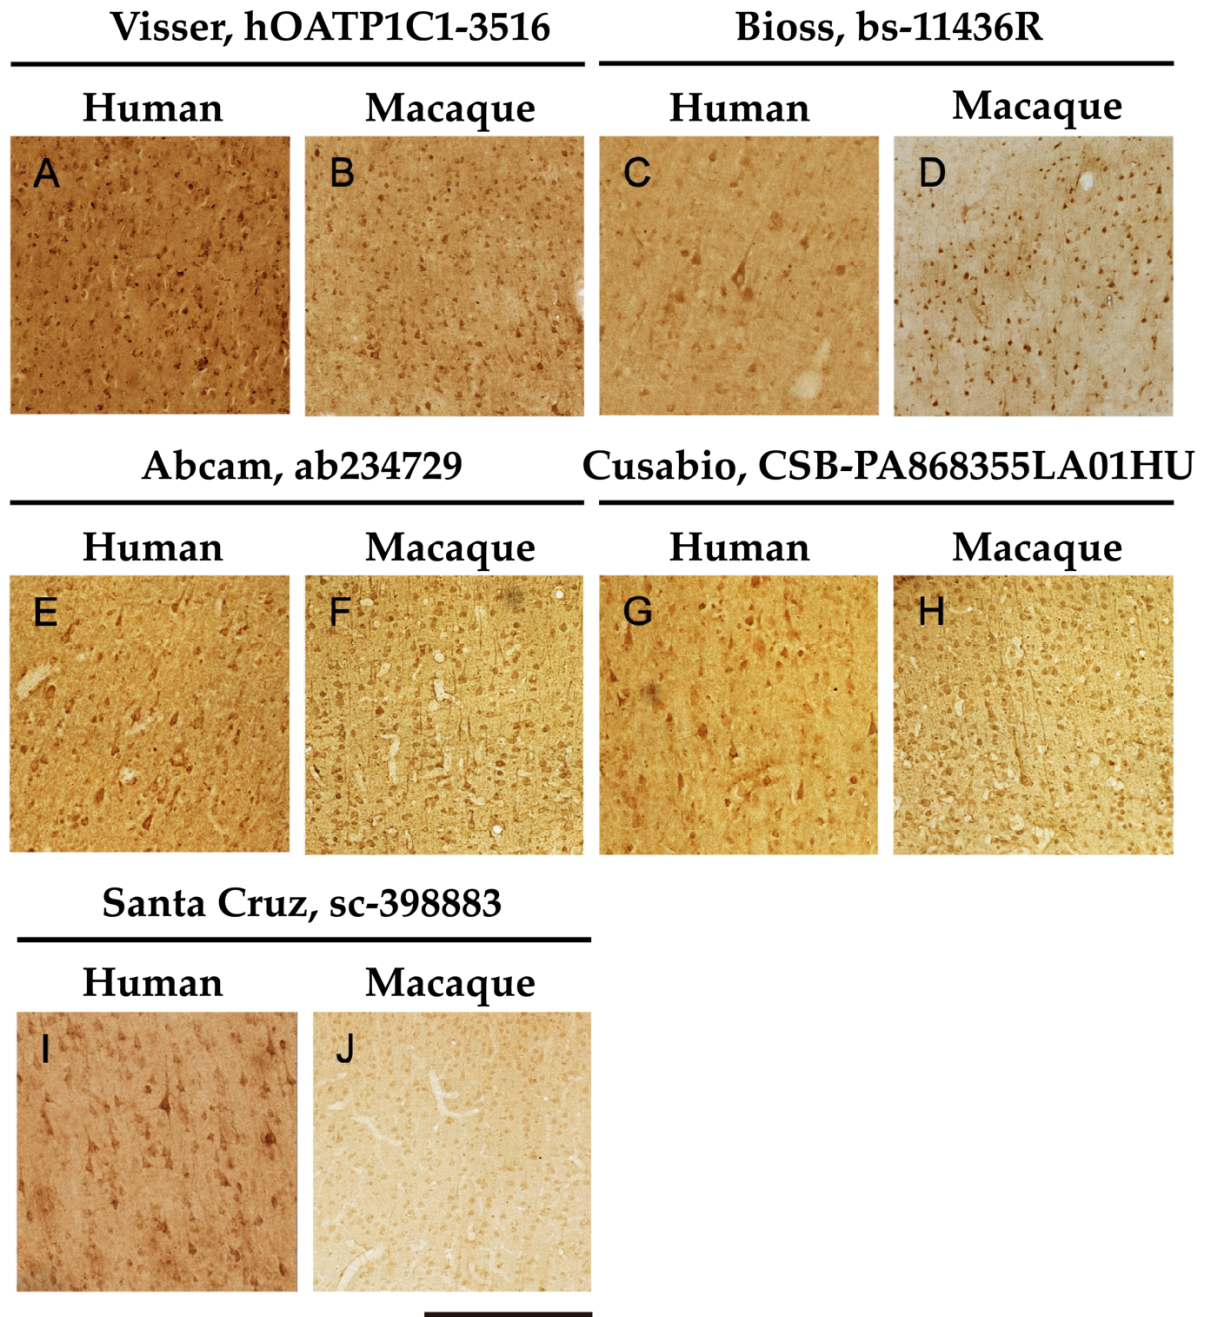

**Figure S3** Validation of anti-OATP1C1 antibodies. **A-J** show immunopositive signals with anti-OATP1C1 antibodies from Visser (hOATP1C1-3516) (**A**, **B**), Bioss (bs-11436R) (**C**, **D**), Abcam (ab234729) (**E**, **F**), Cusabio (CSB-PA868355LA01HU) (**G**, **H**), and Santa Cruz (sc-398883) (**I**, **J**) in layers III-V of human and monkey cortex. Similar results were obtained using these 5 antibodies, except that the Santa Cruz antibody very weakly labels monkey cortex tissues (**J**). Additionally, IHC with Santa Cruz antibody shown in **I** and **J** required antigen retrieval. All antibodies can label multiple types of neurons, including large numbers of pyramidal neurons. Compared with the other antibodies, the antibody from Dr. Visser shows more background noise in human cortex (**A**). The bar represents 200  $\mu$ m (**A-J**).

**Table S1: List of secondary antibodies used in this study.**

| <b>Antibody</b>                                            | <b>Catalog #</b> | <b>Supplier</b>       | <b>IHC Dilution</b> | <b>IF Dilution</b> |
|------------------------------------------------------------|------------------|-----------------------|---------------------|--------------------|
| Goat anti-Rabbit Biotinylated                              | BA-1000          | Vector Laboratories   | 1:200               | -                  |
| Horse anti-Mouse Biotinylated                              | BA-2000          | Vector Laboratories   | 1:200               | -                  |
| Rabbit anti-Rat Biotinylated                               | BA-4000          | Vector Laboratories   | 1:200               | -                  |
| Goat anti-Rabbit Ig gamma-1 chain C region<br>Biotinylated | OASB01959        | Aviva Systems Biology | 1:200               | -                  |
| Goat-anti-Mouse IgG (AF647)                                | A21236           | Invitrogen            | -                   | 1:500              |
| Goat-anti-Mouse IgG (AF546)                                | A11030           | Invitrogen            | -                   | 1:500              |
| Goat-anti-Rabbit IgG (AF488)                               | A11034           | Invitrogen            | -                   | 1:500              |
| Donkey-anti-Rabbit IgG (AF488)                             | A21206           | Invitrogen            | -                   | 1:500              |
| Donkey-anti-Rabbit IgG (AF647)                             | A31573           | Invitrogen            | -                   | 1:500              |
| Donkey-anti-Goat IgG (AF488)                               | A11055           | Invitrogen            |                     | 1:500              |
| Donkey-anti-Goat IgG (AF546)                               | A11056           | Invitrogen            | -                   | 1:500              |
| Donkey-anti-Mouse IgG (AF647)                              | A31571           | Invitrogen            | -                   | 1:500              |
| Donkey-anti-Mouse IgG (AF546)                              | A10036           | Invitrogen            | -                   | 1:500              |
| Goat anti-Human IgM (AF647)                                | A21249           | Invitrogen            | -                   | 1:200              |

**IHC**, immunohistochemistry; **IF**, immunofluorescence.
